# Supplementary material for: Correlation between large rearrangements and patient phenotypes in NF1 deletion syndrome: an update and review
Source: Springer Nature journal article supplement (doi:10.1186/s12920-024-01843-5), 2024-03-06
Supplement: MOESM1 [file 12920_2024_1843_MOESM1_ESM.pdf]

**Supplementary Table 1.** Evaluation of the over-representation of *NF1* deletions larger than 1.2 Mb for each clinical feature, including Patient 2 (deletion >5.5 Mb).

| With sample of <b>Patient 2</b> |                     | <i>NF1</i> deletion size >1.2 Mb |                |     |                | p-value <sup>2</sup> |
|---------------------------------|---------------------|----------------------------------|----------------|-----|----------------|----------------------|
|                                 |                     | No                               | % <sup>1</sup> | Yes | % <sup>1</sup> |                      |
| Overall Severity of NF          | Mild/moderate (N=9) | 2                                | 22.2           | 7   | 77.8           | 0.544                |
|                                 | Severe (N=13)       | 1                                | 7.7            | 12  | 92.3           |                      |
| Plexiform neurofibromas         | No (N=8)            | 1                                | 12.5           | 7   | 87.5           | 1.000                |
|                                 | Yes (N=11)          | 1                                | 9.1            | 10  | 90.9           |                      |
| Lisch Nodules                   | No (N=4)            | 0                                | 0              | 4   | 100            | 1.000                |
|                                 | Yes (N=10)          | 1                                | 10.0           | 9   | 90.0           |                      |
| Macrocephaly                    | No (N=5)            | 0                                | 0              | 5   | 100            | 1.000                |
|                                 | Yes (N=10)          | 1                                | 10.0           | 9   | 90.0           |                      |
| Learning Difficulties           | No (N=2)            | 2                                | 100            | 0   | 0              | <b>0.007</b>         |
|                                 | Yes (N=16)          | 0                                | 0              | 16  | 100            |                      |
| Scoliosis                       | No (N=14)           | 2                                | 14.3           | 12  | 85.7           | 1.000                |
|                                 | Yes (N=5)           | 0                                | 0              | 5   | 100            |                      |
| Other Malignancies              | No (N=17)           | 2                                | 11.8           | 15  | 88.2           | 1.000                |
|                                 | Yes (N=4)           | 0                                | 0              | 4   | 100            |                      |

<sup>1</sup> Percentage calculated over the total of patients for which the data were available (N)

<sup>2</sup> Fisher's exact test

**Supplementary Table 2.** Evaluation of the over-representation of *NF1* deletions larger than 1.2 Mb for each clinical feature, excluding Patient 2 (deletion >5.5 Mb).

| Without sample of <b>Patient 2</b> |                     | <i>NF1</i> deletion size >1.2 Mb |                |     |                | p-value <sup>2</sup> |
|------------------------------------|---------------------|----------------------------------|----------------|-----|----------------|----------------------|
|                                    |                     | No                               | % <sup>1</sup> | Yes | % <sup>1</sup> |                      |
| Overall Severity of NF             | Mild/moderate (N=9) | 2                                | 22.2           | 7   | 77.8           | 0.553                |
|                                    | Severe (N=12)       | 1                                | 8.3            | 11  | 91.7           |                      |
| Plexiform neurofibromas            | No (N=7)            | 1                                | 14.3           | 6   | 85.7           | 1.000                |
|                                    | Yes (N=11)          | 1                                | 9.1            | 10  | 90.9           |                      |
| Lisch Nodules                      | No (N=4)            | 0                                | 0              | 4   | 100            | 1.000                |
|                                    | Yes (N=9)           | 1                                | 11.1           | 8   | 88.9           |                      |
| Macrocephaly                       | No (N=5)            | 0                                | 0              | 5   | 100            | 1.000                |
|                                    | Yes (N=9)           | 1                                | 11.1           | 8   | 88.9           |                      |
| Learning Difficulties              | No (N=2)            | 2                                | 100            | 0   | 0              | <b>0.007</b>         |
|                                    | Yes (N=15)          | 0                                | 0              | 15  | 100            |                      |
| Scoliosis                          | No (N=13)           | 2                                | 15.4           | 11  | 84.6           | 1.000                |
|                                    | Yes (N=5)           | 0                                | 0              | 5   | 100            |                      |
| Other Malignancies                 | No (N=16)           | 2                                | 12.5           | 14  | 87.5           | 1.000                |
|                                    | Yes (N=4)           | 0                                | 0              | 4   | 100            |                      |

<sup>1</sup> Percentage calculated over the total of patients for which the data were available (N)

<sup>2</sup> Fisher's exact test

**Supplementary Tables 3.** Evaluation of the over-representation of *NFI* deletions larger than 1.35 Mb for each clinical feature, including Patient 2 (deletion >5.5 Mb).

| With sample of <b>Patient 2</b> |                     | <i>NFI</i> deletion size >1.35 Mb |                |     |                | p-value <sup>2</sup> |
|---------------------------------|---------------------|-----------------------------------|----------------|-----|----------------|----------------------|
|                                 |                     | No                                | % <sup>1</sup> | Yes | % <sup>1</sup> |                      |
| Overall Severity of NF          | Mild/moderate (N=9) | 5                                 | 55.6           | 4   | 44.4           | 0.074                |
|                                 | Severe (N=13)       | 2                                 | 15.4           | 11  | 84.6           |                      |
| Plexiform neurofibromas         | No (N=8)            | 3                                 | 37.5           | 5   | 62.5           | 1.000                |
|                                 | Yes (N=11)          | 3                                 | 27.3           | 8   | 72.7           |                      |
| Lisch Nodules                   | No (N=4)            | 2                                 | 50.0           | 2   | 50.0           | 0.520                |
|                                 | Yes (N=10)          | 2                                 | 20.0           | 8   | 80.0           |                      |
| Macrocephaly                    | No (N=5)            | 2                                 | 40.0           | 3   | 60.0           | 1.000                |
|                                 | Yes (N=10)          | 3                                 | 30.0           | 7   | 70.0           |                      |
| Learning Difficulties           | No (N=2)            | 2                                 | 100            | 0   | 0              | 0.098                |
|                                 | Yes (N=16)          | 4                                 | 25.0           | 12  | 75.0           |                      |
| Scoliosis                       | No (N=14)           | 4                                 | 28.6           | 10  | 71.4           | 1.000                |
|                                 | Yes (N=5)           | 1                                 | 20.0           | 4   | 80.0           |                      |
| Other Malignancies              | No (N=17)           | 6                                 | 35.3           | 11  | 64.7           | 0.281                |
|                                 | Yes (N=4)           | 0                                 | 0              | 4   | 100            |                      |

<sup>1</sup> Percentage calculated over the total of patients for which the data were available (N)

<sup>2</sup> Fisher's exact test

**Supplementary Tables 4.** Evaluation of the over-representation of *NFI* deletions larger than 1.35 Mb for each clinical feature, excluding Patient 2 (deletion >5.5 Mb).

| Without sample of <b>Patient 2</b> |                     | <i>NFI</i> deletion size >1.35 Mb |                |     |                | p-value <sup>2</sup> |
|------------------------------------|---------------------|-----------------------------------|----------------|-----|----------------|----------------------|
|                                    |                     | No                                | % <sup>1</sup> | Yes | % <sup>1</sup> |                      |
| Overall Severity of NF             | Mild/moderate (N=9) | 5                                 | 55.6           | 4   | 44.4           | 0.159                |
|                                    | Severe (N=12)       | 2                                 | 16.7           | 10  | 83.3           |                      |
| Plexiform neurofibromas            | No (N=7)            | 3                                 | 42.9           | 4   | 57.1           | 0.627                |
|                                    | Yes (N=11)          | 3                                 | 27.3           | 8   | 72.7           |                      |
| Lisch Nodules                      | No (N=4)            | 2                                 | 50.0           | 2   | 50.0           | 0.530                |
|                                    | Yes (N=9)           | 2                                 | 22.2           | 7   | 77.8           |                      |
| Macrocephaly                       | No (N=5)            | 2                                 | 40.0           | 3   | 60.0           | 1.000                |
|                                    | Yes (N=9)           | 3                                 | 33.3           | 6   | 66.7           |                      |
| Learning Difficulties              | No (N=2)            | 2                                 | 100            | 0   | 0              | 0.110                |
|                                    | Yes (N=15)          | 4                                 | 26.7           | 11  | 73.3           |                      |
| Scoliosis                          | No (N=13)           | 4                                 | 30.8           | 9   | 69.2           | 1.000                |
|                                    | Yes (N=5)           | 1                                 | 20.0           | 4   | 80.0           |                      |
| Other Malignancies                 | No (N=16)           | 6                                 | 37.5           | 10  | 62.5           | 0.267                |
|                                    | Yes (N=4)           | 0                                 | 0              | 4   | 100            |                      |

<sup>1</sup> Percentage calculated over the total of patients for which the data were available (N)

<sup>2</sup> Fisher's exact test

**Supplementary Table 5.** Evaluation of the over-representation of *NF1* deletions larger than 1.40 Mb for each clinical feature, including Patient 2 (deletion >5.5 Mb).

| With sample of <b>Patient 2</b> |                     | <i>NF1</i> deletion size >1.40 Mb |                |     |                |                      |
|---------------------------------|---------------------|-----------------------------------|----------------|-----|----------------|----------------------|
|                                 |                     | No                                | % <sup>1</sup> | Yes | % <sup>1</sup> | p-value <sup>2</sup> |
| Overall Severity of NF          | Mild/moderate (N=9) | 7                                 | 77.8           | 2   | 22.2           | 0.380                |
|                                 | Severe (N=13)       | 7                                 | 53.8           | 6   | 46.2           |                      |
| Plexiform neurofibromas         | No (N=8)            | 5                                 | 62.5           | 3   | 37.5           | 1.000                |
|                                 | Yes (N=11)          | 8                                 | 72.7           | 3   | 27.3           |                      |
| Lisch Nodules                   | No (N=4)            | 3                                 | 75.0           | 1   | 25.0           | 1.000                |
|                                 | Yes (N=10)          | 7                                 | 70.0           | 3   | 30.0           |                      |
| Macrocephaly                    | No (N=5)            | 4                                 | 80.0           | 1   | 20.0           | 1.000                |
|                                 | Yes (N=10)          | 7                                 | 70.0           | 3   | 30.0           |                      |
| Learning Difficulties           | No (N=2)            | 2                                 | 100            | 0   | 0              | 0.529                |
|                                 | Yes (N=16)          | 10                                | 62.5           | 6   | 37.5           |                      |
| Scoliosis                       | No (N=14)           | 8                                 | 57.1           | 6   | 42.9           | 1.000                |
|                                 | Yes (N=5)           | 3                                 | 60.0           | 2   | 40.0           |                      |
| Other Malignancies              | No (N=17)           | 11                                | 64.7           | 6   | 35.3           | 0.618                |
|                                 | Yes (N=4)           | 2                                 | 50.0           | 2   | 50.0           |                      |

<sup>1</sup> Percentage calculated over the total of patients for which the data were available (N)

<sup>2</sup> Fisher's exact test

**Supplementary Table 6.** Evaluation of the over-representation of *NF1* deletions larger than 1.40 Mb for each clinical feature, excluding Patient 2 (deletion >5.5 Mb).

| Without sample of <b>Patient 2</b> |                     | <i>NF1</i> deletion size >1.40 Mb |                |     |                |                      |
|------------------------------------|---------------------|-----------------------------------|----------------|-----|----------------|----------------------|
|                                    |                     | No                                | % <sup>1</sup> | Yes | % <sup>1</sup> | p-value <sup>2</sup> |
| Overall Severity of NF             | Mild/moderate (N=9) | 7                                 | 77.8           | 2   | 22.2           | 0.642                |
|                                    | Severe (N=12)       | 7                                 | 58.3           | 5   | 41.7           |                      |
| Plexiform neurofibromas            | No (N=7)            | 5                                 | 71.4           | 2   | 28.6           | 1.000                |
|                                    | Yes (N=11)          | 8                                 | 72.7           | 3   | 27.3           |                      |
| Lisch Nodules                      | No (N=4)            | 3                                 | 75.0           | 1   | 25.0           | 1.000                |
|                                    | Yes (N=9)           | 7                                 | 77.8           | 2   | 22.2           |                      |
| Macrocephaly                       | No (N=5)            | 4                                 | 80.0           | 1   | 20.0           | 1.000                |
|                                    | Yes (N=9)           | 7                                 | 77.8           | 2   | 22.2           |                      |
| Learning Difficulties              | No (N=2)            | 2                                 | 100            | 0   | 0              | 1.000                |
|                                    | Yes (N=15)          | 10                                | 66.7           | 5   | 33.3           |                      |
| Scoliosis                          | No (N=13)           | 8                                 | 61.5           | 5   | 38.5           | 1.000                |
|                                    | Yes (N=5)           | 3                                 | 60.0           | 2   | 40.0           |                      |
| Other Malignancies                 | No (N=16)           | 11                                | 68.8           | 5   | 31.2           | 0.587                |

|           |   |      |   |      |
|-----------|---|------|---|------|
| Yes (N=4) | 2 | 50.0 | 2 | 50.0 |
|-----------|---|------|---|------|

---

<sup>1</sup> Percentage calculated over the total of patients for which the data were available (N)

<sup>2</sup> Fisher's exact test
